# Supplementary material for: Role of BgaA as a Pneumococcal Virulence Factor Elucidated by Molecular Evolutionary Analysis
Source: Front Microbiol. 2020 Sep 24;11:582437. doi: 10.3389/fmicb.2020.582437 (PMC7541833; doi:10.3389/fmicb.2020.582437)
Supplement: Supplementary file 2 [file Data_Sheet_2.XLSX]

## Sheet: Sheet1
Supplementary Table 2. Locus tag number of genes encoding cell wall anchoring proteins in each pneumococcal strain.
	TIGR4	P1031	INV104	gamPNI0373	NCTC7465	D39	R6	SPNA45	OXC141	SPN034156	SPN034183	SPN994038	SPN994039	A66	70585	670-6B	AP200	CGSP14	INV200	Hungary19A-6	TCH8431/19A	JJA	Taiwan19F-14	G54	ST556	A026	ATCC 700669	NT_110_58
strH	SP_0057	SPP_0122	INV104_00480	HMPREF1038_00122	ERS445053_00412	SPD_0063	spr0057	SPNA45_01971	SPNOXC00950	SPN034156_11630	SPN034183_01010	SPN994038_01010	SPN994039_01010	A66_00067 (82936-84352)	SP70585_0124	SP670_0135	SPAP_0106	SPCG_0059	SPNINV200_00560	SPH_0164	HMPREF0837_10346	SPJ_0088	SPT_0095	SPG_0062	MYY_0132	T308_00220	SPN23F00730	SpnNT_00084-SpnNT_00085
pavB	SP_0082	SPP_0144	INV104_00660 (79411-81981)	HMPREF1038_00143	ERS445053_00393	SPD_0080	spr0075	SPNA45_01952	SPNOXC01130	SPN034156_11800	SPN034183_01180	SPN994038_01180	SPN994039_01180	A66_00090	SP70585_0145	SP670_0156	SPAP_0126	SPCG_0080	SPNINV200_00760	SPH_0184	HMPREF0837_10368	SPJ_0108	SPT_0116	SPG_0083	MYY_0153	T308_00320	pseudo SPN23F00940	SpnNT_00105
spuA	SP_0268	SPP_0319	INV104_02270	HMPREF1038_00325	ERS445053_00223	SPD_0250	spr0247	SPNA45_01766	SPNOXC02880	pseudo SPN034156_13440	SPN034183_02940	SPN994038_02820	SPN994039_02830	A66_00266	SP70585_0328	SP670_0342	SPAP_0317	SPCG_0278	SPNINV200_02500	SPH_0386	HMPREF0837_10585	SPJ_0278	SPT_0315	SPG_0253	MYY_0349	T308_01310	SPN23F02560	SpnNT_00275
spnHL	SP_0314	SPP_0350	INV104_02610	HMPREF1038_00364	ERS445053_00184	SPD_0287	spr0286	SPNA45_01722	SPNOXC03250	pseudo SPN034156_13820	SPN034183_03320	SPN994038_03200	pseudo SPN994039_03210	A66_00307	SP70585_0379	SP670_0382	SPAP_0347	SPCG_0322	SPNINV200_02820	SPH_0426	HMPREF0837_10617	SPJ_0310	SPT_0364	SPG_0285	MYY_0397	T308_01575	SPN23F02890	SpnNT_00308
eng	SP_0368	SPP_0406	INV104_03160	HMPREF1038_00418	ERS445053_00128	SPD_0335	spr0328	SPNA45_01682	SPNOXC03640	SPN034156_14200	SPN034183_03700	SPN994038_03580	SPN994039_03590	A66_00350	SP70585_0439	SP670_0436	SPAP_0392	SPCG_0364	SPNINV200_03290	SPH_0475	HMPREF0837_10665	SPJ_0354	SPT_0411	SPG_0333	MYY_0445	T308_01820	SPN23F03400	-
endoD	SP_0498	SPP_0520	INV104_04240	HMPREF1038_00531	ERS445053_00019	SPD_0444	spr0440	SPNA45_01580	SPNOXC04620	SPN034156_15190	SPN034183_04650	SPN994038_04530	SPN994039_04540	A66_00463	SP70585_0558	SP670_0573	SPAP_0500	SPCG_0476	SPNINV200_04410	SPH_0607	HMPREF0837_10793	SPJ_0467	SPT_0535	SPG_0450-451	MYY_0564	T308_02395	SPN23F04520	SpnNT_00452
prtA	SP_0641	SPP_0657	INV104_05360	HMPREF1038_00665	ERS445053_02065	SPD_0558	spr0561	SPNA45_01464	SPNOXC05890	SPN034156_16380	SPN034183_05900	SPN994038_05790	SPN994039_05800	A66_00581	SP70585_0702	SP670_0699	SPAP_0630	SPCG_0599	SPNINV200_05660	SPH_0733	HMPREF0837_10933	SPJ_0592	SPT_0666	SPG_0584	MYY_0688	T308_03025	SPN23F05790	SpnNT_00640
bgaA	SP_0648	SPP_0665	INV104_05400	HMPREF1038_00674	ERS445053_02061	SPD_0562	spr0565	SPNA45_00990	SPNOXC05930	SPN034156_16420	SPN034183_05940	SPN994038_05830	SPN994039_05840	A66_00585	SP70585_0707	SP670_0704	SPAP_0635	SPCG_0603	SPNINV200_05700	SPH_0741	HMPREF0837_10938	SPJ_0596	SPT_0670	SPG_0588	MYY_0692	T308_03055	SPN23F05830	SpnNT_02239-02240
mucB	SP_1492	SPP_1511	INV104_12680	HMPREF1038_01475	ERS445053_01292	SPD_1321	spr1345	SPNA45_00727	SPNOXC13080	SPN034156_03960	SPN034183_13070	SPN994038_12960	SPN994039_12970	A66_01324	SP70585_1531	SP670_0806	SPAP_1516	SPCG_1476 (1451622-1452059)	SPNINV200_13310	SPH_1604	HMPREF0837_11725	SPJ_1392	SPT_1429	SPG_1416	MYY_1421	T308_06755	SPN23F14570	SpnNT_01499
pclA	-	-	INV104_13190	-	-	SPD_1376	spr1403	-	-	-	-	-	-	-	SP70585_1587	-	-	-	-	-	HMPREF0837_11782	SPJ_1452	SPT_1486	-	MYY_1479	T308_07035	SPN23F15110	-
nanA	SP_1693	SPP_1709	INV104_14420	HMPREF1038_01674	ERS445053_01114	SPD_1504	spr1536	SPNA45_00548	SPNOXC14880	SPN034156_05750	SPN034183_14850	SPN994038_14740	SPN994039_14750	A66_01518	SP70585_1731	SP670_1783	SPAP_1700	SPCG_1665	SPNINV200_15140	SPH_1797	HMPREF0837_11935	SPJ_1586	SPT_1630	SPG_1600	MYY_1615	T308_07725	SPN23F16920	SpnNT_01752
psrP	SP_1772	-	INV104_15160	-	-	-	-	-	-	-	-	-	-	-	SP70585_1816	-	-	SPCG_1750	SPNINV200_15910	-	-	-	-	-	-	-	-	-
pfbA	SP_1833	SPP_1834	INV104_15760	HMPREF1038_01802	ERS445053_00961	SPD_1617	spr1652	SPNA45_00413 (415705-417830)	SPNOXC16100	SPN034156_06820	SPN034183_16120	SPN994038_16010	SPN994039_16020	A66_01635	SP70585_1890	SP670_1908	SPAP_1829	SPCG_1811	SPNINV200_16570	SPH_1950	HMPREF0837_12057	SPJ_1740	SPT_1752	SPG_1720	MYY_1731	T308_08315	SPN23F18510	SpnNT_01867
spr1806	SP_1992	SPP_2015	INV104_17140	HMPREF1038_01976	ERS445053_00789	SPD_1789	spr1806	SPNA45_00227	SPNOXC17510	SPN034156_08310	SPN034183_17550	SPN994038_17440	SPN994039_17450	A66_01788	SP70585_2064	SP670_2070	SPAP_2004	SPCG_1957	SPNINV200_18030	SPH_2134	HMPREF0837_12261	SPJ_1985	SPT_1972	SPG_1894	MYY_1914	T308_09355	SPN23F20130	SpnNT_02034
Numbers in parentheses indicate regions in each whole genome sequence.
